# Supplementary material
Source: PubMed Central journal article supplement (PMC3071567)
Supplement: NIHMS264354-supplement-01.pdf [file NIHMS264354-supplement-01.pdf]

**Supplementary Table 1:** Distribution of allele and genotype frequencies in the included studies

| <b>MTHFR 677C&gt;T polymorphism</b> |                   |                       |                   |                                  |            |                                    |            |           |
|-------------------------------------|-------------------|-----------------------|-------------------|----------------------------------|------------|------------------------------------|------------|-----------|
| <b>Author</b>                       | <b>Population</b> | <b>Disease status</b> | <b>Study size</b> | <b>Allele frequencies, n (%)</b> |            | <b>Genotype frequencies, n (%)</b> |            |           |
|                                     |                   |                       |                   | <b>C</b>                         | <b>T</b>   | <b>CC</b>                          | <b>CT</b>  | <b>TT</b> |
| Kowa, 2000 <sup>1</sup>             | women+men         | controls              | 261               | 340 (65)                         | 182 (35)   | 104 (39.8)                         | 132 (50.6) | 25 (9.6)  |
|                                     |                   | any migraine          | 74                | 77 (52)                          | 71 (48)    | 18 (24.3)                          | 41 (55.4)  | 15 (20.3) |
|                                     |                   | MA                    | 22                | 16 (36)                          | 28 (64)    | 3 (13.6)                           | 10 (45.5)  | 9 (40.9)  |
|                                     |                   | MO                    | 52                | 61 (59)                          | 43 (41)    | 15 (28.8)                          | 31 (59.6)  | 6 (11.5)  |
| Kara, 2003 <sup>2</sup>             | women+men         | controls              | 136               | 203 (74.6)                       | 69 (25.4)  | 69 (50.7)                          | 65 (47.8)  | 2 (1.5)   |
|                                     |                   | any migraine          | 93                | 121 (65.1)                       | 65 (34.9)  | 36 (38.7)                          | 49 (52.7)  | 8 (8.6)   |
|                                     |                   | MA                    | 23                | 34 (73.9)                        | 12 (26.1)  | 12 (52.2)                          | 10 (43.5)  | 1 (4.3)   |
|                                     |                   | MO                    | 70                | 87 (62.1)                        | 53 (37.9)  | 24 (34.3)                          | 39 (55.7)  | 7 (10.0)  |
| Lea, 2004 <sup>3</sup>              | women+men         | controls              | 269               | 363 (67)                         | 175 (33)   | 117 (43)                           | 129 (48)   | 23 (9)    |
|                                     |                   | any migraine          | 268               | 333 (62)                         | 203 (38)   | 104 (39)                           | 125 (46)   | 39 (15)   |
|                                     |                   | MA                    | 168               | 200 (60)                         | 136 (40)   | 64 (38)                            | 72 (43)    | 32 (19)   |
|                                     |                   | MO                    | 100               | 133 (66)                         | 67 (34)    | 40 (40)                            | 53 (53)    | 7 (7)     |
| Oterino, 2005 <sup>4</sup>          | women+men         | controls              | 237               | 302 (63.7)                       | 172 (36.3) | 94 (39.7)                          | 114 (48.1) | 29 (12.2) |
|                                     |                   | any migraine          | 329               | 431 (65.5)                       | 227 (34.5) | 142 (43.2)                         | 147 (44.7) | 40 (12.2) |
|                                     |                   | MA                    | 138               | 164 (59.4)                       | 112 (40.6) | 52 (37.7)                          | 60 (43.5)  | 26 (18.8) |
|                                     |                   | MO                    | 191               | 267 (69.9)                       | 115 (30.1) | 90 (47.1)                          | 87 (45.5)  | 14 (7.3)  |
| Scher, 2006 <sup>5</sup>            | women+men         | controls              | 1212              | 1661 (68.5)                      | 763 (31.5) | 567 (47)                           | 527 (43)   | 118 (10)  |
|                                     |                   | any migraine          | 413               | 548 (66.3)                       | 278 (33.7) | 181 (43.9)                         | 186 (45.0) | 46 (11.1) |
|                                     |                   | MA                    | 187               | 230 (61.5)                       | 144 (38.5) | 72 (39)                            | 86 (46)    | 29 (16)   |
|                                     |                   | MO                    | 226               | 318 (70.4)                       | 134 (29.6) | 109 (48)                           | 100 (44)   | 17 (8)    |
| Todt, 2006 <sup>6</sup>             | women+men         | controls              | 625               | 802 (64.2)                       | 448 (35.8) | 251 (40.2)                         | 300 (48)   | 74 (11.8) |
|                                     |                   | MA                    | 656               | 879 (67)                         | 433 (33)   | 300 (45.7)                         | 279 (42.5) | 77 (11.7) |
| Kaunisto, 2006 <sup>7</sup>         | women+men         | controls              | 900               | 1368 (76)                        | 432 (24)   | 522 (58)                           | 324 (36)   | 54 (6)    |
|                                     |                   | MA                    | 898               | 1374 (76)                        | 422 (24)   | 521 (58)                           | 332 (37)   | 45 (5)    |
| Bottini, 2006 <sup>8</sup>          | women+men         | controls              | 66                | 81 (61.4)                        | 51 (38.6)  | 24 (29.7)                          | 33 (50)    | 9 (13.6)  |
|                                     |                   | any migraine          | 45                | 49 (54.4)                        | 41 (45.6)  | 16 (35.6)                          | 17 (37.8)  | 12 (26.7) |
|                                     |                   | MA                    | 33                | 35 (53)                          | 31 (47)    | 11 (33.3)                          | 13 (39.4)  | 9 (27.3)  |
|                                     |                   | MO                    | 12                | 14 (58)                          | 10 (42)    | 5 (41.7)                           | 4 (33.3)   | 3 (25)    |
| de Tommaso, 2007 <sup>9</sup>       | women+men         | controls              | 97                | 119 (61.35)                      | 75 (38.65) | 36 (37.1)                          | 47 (48.5)  | 14 (14.3) |
|                                     |                   | any migraine          | 105               | 111 (52.86)                      | 99 (47.14) | 33 (31.4)                          | 45 (42.9)  | 27 (25.7) |

|                             |           |              |           |            |            |             |             |             |
|-----------------------------|-----------|--------------|-----------|------------|------------|-------------|-------------|-------------|
| Pezzini, 2007 <sup>10</sup> | women+men | controls     | 105       | 133 (63.3) | 77 (36.7)  | 41 (39.0)   | 51 (48.6)   | 13 (12.4)   |
|                             |           | any migraine | 206       | 240 (58.3) | 172 (41.7) | 75 (36.4)   | 90 (43.7)   | 41 (19.9)   |
|                             |           | MA           | 100       | 107 (53.5) | 93 (46.5)  | 33 (33)     | 41 (41)     | 26 (26)     |
|                             |           | MO           | 106       | 133 (62.7) | 79 (37.3)  | 42 (39.6)   | 49 (46.2)   | 15 (14.2)   |
| Schürks, 2008 <sup>11</sup> | women     | controls     | 20424     | 27285 (67) | 13563 (33) | 9173 (44.9) | 8939 (43.8) | 2312 (11.3) |
|                             |           | any migraine | 4577      | 6178 (67)  | 2976 (33)  | 2070 (45.2) | 2038 (44.5) | 469 (10.3)  |
|                             |           | MA           | 1275      | 1749 (69)  | 801 (31)   | 591 (46.3)  | 567 (44.5)  | 117 (9.2)   |
|                             |           | MO           | 1951      | 2590 (66)  | 1312 (34)  | 855 (43.8)  | 880 (45.1)  | 216 (11.1)  |
| Ferro, 2008 <sup>12</sup>   | women+men | controls     | 96        | 117 (61)   | 75 (39)    | 35 (36)     | 47 (49)     | 14 (15)     |
|                             |           | any migraine | 186       | 249 (67)   | 123 (33)   | 79 (42)     | 91 (49)     | 16 (9)      |
|                             |           | MA           | 78        | 110 (71)   | 46 (29)    | 37 (47)     | 36 (46)     | 5 (6)       |
|                             |           | MO           | 108       | 139 (64)   | 77 (36)    | 42 (39)     | 55 (51)     | 11 (10)     |
| Joshi, 2009 <sup>13</sup>   | women+men | controls     | 150       | 255 (85.5) | 45 (15.5)  | 108 (72.0)  | 39 (26.0)   | 3 (2.0)     |
|                             |           | any migraine | 150       | 254 (84.7) | 46 (15.3)  | 104 (69.3)  | 46 (30.7)   | 0 (0.0)     |
|                             |           | MA           | 67        | 113 (84.3) | 21 (15.7)  | 46 (69.9)   | 21 (30.1)   | 0 (0.0)     |
|                             |           | MO           | 83        | 141 (85.0) | 25 (15.0)  | 58 (70.2)   | 25 (29.8)   | 0 (0.0)     |
|                             | women     | controls     | 100       | 169 (84.5) | 31 (15.5)  | 72 (72.0)   | 25 (25.0)   | 3 (3.0)     |
|                             |           | any migraine | 100       | 166 (83.0) | 34 (17.0)  | 66 (66.0)   | 34 (34.0)   | 0 (0.0)     |
|                             | men       | controls     | 50        | 86 (86.0)  | 14 (14.0)  | 36 (72.0)   | 14 (28.0)   | 0 (0.0)     |
| any migraine                |           | 50           | 88 (88.0) | 12 (12.0)  | 38 (76.0)  | 12 (24.0)   | 0 (0.0)     |             |

**ACE D/I polymorphism**

| Author                      | Population | Disease status | Study size | Allele frequencies, n (%) |             | Genotype frequencies, n (%) |             |             |
|-----------------------------|------------|----------------|------------|---------------------------|-------------|-----------------------------|-------------|-------------|
|                             |            |                |            | D                         | I           | DD                          | DI          | II          |
| Paterna, 2000 <sup>14</sup> | women+men  | controls       | 201        | 251 (62.4)                | 151 (37.6)  | 75 (37.32)                  | 101 (50.24) | 25 (12.43)  |
|                             |            | MO             | 302        | 421 (69.7)                | 183 (30.3)  | 146 (48.34)                 | 129 (42.71) | 27 (8.94)   |
| Cakmak, 2003 <sup>15</sup>  | women+men  | controls       | 231        | 275 (59.53)               | 187 (40.47) | 88 (38.1)                   | 99 (42.8)   | 44 (19)     |
|                             |            | any migraine   | 200        | 237 (59.25)               | 163 (40.75) | 77 (38.5)                   | 83 (41.5)   | 40 (20)     |
|                             | women      | controls       | 78         | 99 (63.41)                | 57 (36.58)  | 31 (39.7)                   | 34 (43.6)   | 13 (16.7)   |
|                             |            | any migraine   | 174        | 204 (58.62)               | 144 (41.37) | 65 (37.4)                   | 74 (42.5)   | 35 (20.1)   |
|                             | men        | controls       | 153        | 179 (58.49)               | 127 (41.5)  | 57 (37.2)                   | 65 (42.5)   | 31 (20.3)   |
|                             |            | any migraine   | 26         | 33 (63.46)                | 19 (36.53)  | 12 (46.2)                   | 9 (34.6)    | 5 (19.2)    |
| Lin, 2005 <sup>16</sup>     | women+men  | controls       | 200        | 153 (38.3)                | 247 (61.8)  | 34 (17.0)                   | 85 (42.5)   | 81 (40.5)   |
|                             |            | any migraine   | 240        | 175 (36.5)                | 305 (63.5)  | 40 (16.7)                   | 95 (39.6)   | 105 (43.7)  |
|                             | women      | controls       | 141        | 107 (37.9)                | 175 (62.1)  | 23 (16.3)                   | 61 (43.3)   | 57 (40.4)   |
|                             |            | any migraine   | 169        | 134 (39.6)                | 204 (60.4)  | 35 (20.7)                   | 64 (37.9)   | 70 (41.4)   |
|                             | men        | controls       | 59         | 46 (39.0)                 | 72 (61.0)   | 11 (18.6)                   | 24 (40.7)   | 24 (40.7)   |
|                             |            | any migraine   | 71         | 41 (28.9)                 | 101 (71.1)  | 5 (7.0)                     | 31 (43.7)   | 35 (49.3)   |
| Kowa, 2005 <sup>17</sup>    | women+men  | controls       | 248        | 176 (35)                  | 320 (65)    | 31 (12)                     | 114 (46)    | 103 (42)    |
|                             |            | any migraine   | 176        | 152 (43.2)                | 200 (56.8)  | 33 (18.8)                   | 86 (48.8)   | 57 (32.4)   |
|                             |            | MA             | 54         | 54 (50)                   | 54 (50)     | 14 (26)                     | 26 (48)     | 14 (26)     |
|                             |            | MO             | 122        | 98 (40)                   | 146 (60)    | 19 (16)                     | 60 (49)     | 43 (35)     |
| Lea, 2005 <sup>18</sup>     | women+men  | controls       | 244        | 274 (56)                  | 214 (44)    | 76 (31)                     | 122 (50)    | 46 (19)     |
|                             |            | any migraine   | 250        | 296 (59)                  | 204 (41)    | 77 (31)                     | 142 (57)    | 31 (12)     |
|                             |            | MA             | 151        | 181 (60)                  | 121 (40)    | 48 (32)                     | 85 (56)     | 18 (12)     |
|                             |            | MO             | 99         | 115 (58)                  | 83 (42)     | 29 (29)                     | 57 (58)     | 13 (13)     |
| Kara, 2007 <sup>19</sup>    | women+men  | controls       | 210        | 252 (60)                  | 168 (40)    | 81 (38.5)                   | 90 (42.9)   | 39 (18.6)   |
|                             |            | any migraine   | 180        | 239 (66.39)               | 121 (33.61) | 72 (40)                     | 95 (52.8)   | 13 (7.2)    |
|                             |            | MA             | 59         | 79 (66.95)                | 39 (33.05)  | 25 (42.4)                   | 29 (49.1)   | 5 (8.5)     |
|                             |            | MO             | 109        | 144 (66.06)               | 74 (33.94)  | 43 (39.5)                   | 58 (53.2)   | 8 (7.3)     |
| Tronvik, 2008 <sup>20</sup> | women+men  | controls       | 403        | 388 (48.1)                | 418 (51.9)  | 92 (26.6)                   | 204 (50.6)  | 107 (22.8)  |
|                             |            | any migraine   | 347        | 342 (49.3)                | 352 (50.7)  | 78 (22.5)                   | 186 (53.6)  | 83 (23.9)   |
|                             |            | MA             | 155        | 155 (50)                  | 155 (50)    | 34 (21.9)                   | 87 (56.1)   | 34 (21.9)   |
|                             |            | MO             | 187        | 182 (48.7)                | 192 (51.3)  | 43 (23.0)                   | 96 (51.3)   | 48 (25.7)   |
| Schürks, 2009 <sup>21</sup> | women      | controls       | 20423      | 21365 (52)                | 19481 (48)  | 5996 (29.4)                 | 9373 (45.9) | 5054 (24.7) |
|                             |            | any migraine   | 4577       | 4806 (53)                 | 4348 (47)   | 1331 (29.1)                 | 2144 (46.8) | 1102 (24.1) |
|                             |            | MA             | 1275       | 1346 (53)                 | 1204 (47)   | 370 (29.0)                  | 606 (47.5)  | 299 (23.5)  |
|                             |            | MO             | 1951       | 2085 (53)                 | 1817 (47)   | 584 (29.9)                  | 917 (47.0)  | 450 (23.1)  |
| Joshi, 2009 <sup>13</sup>   | women+men  | controls       | 150        | 104 (34.7)                | 196 (65.3)  | 12 (8.0)                    | 78 (52.0)   | 60 (40.0)   |
|                             |            | any migraine   | 150        | 114 (38.0)                | 186 (62.0)  | 18 (12.0)                   | 78 (52.0)   | 54 (36.0)   |

|  |       |              |     |           |            |           |            |            |
|--|-------|--------------|-----|-----------|------------|-----------|------------|------------|
|  |       | MA           | 67  | 58 (43.3) | 76 (56.7)  | 11 (16.4) | 36 (53.7)  | 20 (29.9)  |
|  |       | MO           | 83  | 56 (33.7) | 110 (66.3) | 7 (8.4)   | 42 (50.6)  | 34 (41.0)  |
|  | women | controls     | 100 | 62 (31.0) | 138 (69.0) | 5 (5.0)   | 52 (52.0)  | 43 (43.0)  |
|  |       | any migraine | 100 | 76 (38.0) | 124 (62.0) | 10 (10.0) | 56 (56.0)  | 34 (34.0)  |
|  |       | MA           | 51  | 42 (41.2) | 60 (58.8)  | 7 (13.7)  | 28 (54.9)  | 16 (31.4)  |
|  |       | MO           | 49  | 34 (34.7) | 64 (65.3)  | 3 (6.12)  | 28 (57.14) | 18 (36.74) |
|  | men   | controls     | 50  | 42 (42.0) | 58 (58.0)  | 8 (16.0)  | 26 (52.0)  | 16 (32.0)  |
|  |       | any migraine | 50  | 38 (38.0) | 62 (62.0)  | 8 (16.0)  | 22 (44.0)  | 20 (40.0)  |
|  |       | MA           | 16  | 16 (50.0) | 16 (50.0)  | 4 (25.0)  | 8 (50.0)   | 4 (25.0)   |
|  |       | MO           | 34  | 22 (32.4) | 46 (67.6)  | 4 (11.8)  | 14 (41.2)  | 16 (47.0)  |

MA: migraine with aura; MO: migraine without aura

1. Kowa H, Yasui K, Takeshima T, Urakami K, Sakai F, Nakashima K. The homozygous C677T mutation in the methylenetetrahydrofolate reductase gene is a genetic risk factor for migraine. *Am J Med Genet.* 2000;96:762-764.
2. Kara I, Sazci A, Ergul E, Kaya G, Kilic G. Association of the C677T and A1298C polymorphisms in the 5,10 methylenetetrahydrofolate reductase gene in patients with migraine risk. *Brain Res Mol Brain Res.* 2003;111:84-90.
3. Lea RA, Ovcacic M, Sundholm J, MacMillan J, Griffiths LR. The methylenetetrahydrofolate reductase gene variant C677T influences susceptibility to migraine with aura. *BMC Med.* 2004;2:3.
4. Oterino A, Valle N, Pascual J, *et al.* Thymidylate synthase promoter tandem repeat and MTHFD1 R653Q polymorphisms modulate the risk for migraine conferred by the MTHFR T677 allele. *Brain Res Mol Brain Res.* 2005;139:163-168.
5. Scher AI, Terwindt GM, Verschuren WM, *et al.* Migraine and MTHFR C677T genotype in a population-based sample. *Ann Neurol.* 2006;59:372-375.
6. Todt U, Freudenberg J, Goebel I, *et al.* MTHFR C677T polymorphism and migraine with aura. *Ann Neurol.* 2006;60:621-622; author reply 622-623.
7. Kaunisto MA, Kallela M, Hamalainen E, *et al.* Testing of variants of the MTHFR and ESR1 genes in 1798 Finnish individuals fails to confirm the association with migraine with aura. *Cephalalgia.* 2006;26:1462-1472.
8. Bottini F, Celle ME, Calevo MG, *et al.* Metabolic and genetic risk factors for migraine in children. *Cephalalgia.* 2006;26:731-737.
9. de Tommaso M, Difruscolo O, Sardaro M, *et al.* Influence of MTHFR genotype on contingent negative variation and MRI abnormalities in migraine. *Headache.* 2007;47:253-265.
10. Pezzini A, Grassi M, Del Zotto E, *et al.* Migraine mediates the influence of C677T MTHFR genotypes on ischemic stroke risk with a stroke-subtype effect. *Stroke.* 2007;38:3145-3151.
11. Schürks M, Zee RY, Buring JE, Kurth T. Interrelationships among the MTHFR 677C>T polymorphism, migraine, and cardiovascular disease. *Neurology.* 2008;71:505-513.
12. Ferro A, Castro MJ, Lemos C, *et al.* The C677T polymorphism in MTHFR is not associated with migraine in Portugal. *Dis Markers.* 2008;25:107-113.
13. Joshi G, Pradhan S, Mittal B. Role of the ACE ID and MTHFR C677T polymorphisms in genetic susceptibility of migraine in a north Indian population. *J Neurol Sci.* 2009;277:133-137.
14. Paterna S, Di Pasquale P, D'Angelo A, *et al.* Angiotensin-converting enzyme gene deletion polymorphism determines an increase in frequency of migraine attacks in patients suffering from migraine without aura. *Eur Neurol.* 2000;43:133-136.
15. Cakmak EA, Cataloluk O, Yoldas T, *et al.* Migraine and angiotensin-converting enzyme association in Turkish patients. *Pain Clinic.* 2003;15:473-477.
16. Lin JJ, Wang PJ, Chen CH, Yueh KC, Lin SZ, Harn HJ. Homozygous deletion genotype of angiotensin converting enzyme confers protection against migraine in man. *Acta Neurol Taiwan.* 2005;14:120-125.

17. Kowa H, Fusayasu E, Ijiri T, *et al.* Association of the insertion/deletion polymorphism of the angiotensin I-converting enzyme gene in patients of migraine with aura. *Neurosci Lett.* 2005;374:129-131.
18. Lea RA, Ovcarić M, Sundholm J, Solyom L, Macmillan J, Griffiths LR. Genetic variants of angiotensin converting enzyme and methylenetetrahydrofolate reductase may act in combination to increase migraine susceptibility. *Brain Res Mol Brain Res.* 2005;136:112-117.
19. Kara I, Ozkok E, Aydin M, *et al.* Combined effects of ACE and MMP-3 polymorphisms on migraine development. *Cephalalgia.* 2007;27:235-243.
20. Tronvik E, Stovner LJ, Bovim G, *et al.* Angiotensin-converting enzyme gene insertion/deletion polymorphism in migraine patients. *BMC Neurol.* 2008;8:4.
21. Schürks M, Zee RYL, Buring JE, Kurth T. ACE D/I Polymorphism, Migraine, and Cardiovascular Disease in Women. *Neurology.* 2009;72:650-656.

**Supplementary Table 2:** Hardy-Weinberg Equilibrium and odds ratios (95% confidence intervals) for the included studies

| <b>MTHFR 677C&gt;T polymorphism</b> |                   |                       |                   |            |                       |                |                       |                |                        |                |
|-------------------------------------|-------------------|-----------------------|-------------------|------------|-----------------------|----------------|-----------------------|----------------|------------------------|----------------|
| <b>Author</b>                       | <b>Population</b> | <b>Disease status</b> | <b>Study size</b> | <b>HWE</b> | <b>Additive model</b> |                | <b>Dominant model</b> |                | <b>Recessive model</b> |                |
|                                     |                   |                       |                   |            | <b>OR (95% CI)</b>    | <b>P value</b> | <b>OR (95% CI)</b>    | <b>P value</b> | <b>OR (95% CI)</b>     | <b>P value</b> |
| Kowa, 2000 <sup>1</sup>             | women+men         | controls              | 261               | 0.0755     | Referent              | ----           | Referent              | ----           | Referent               | ----           |
|                                     |                   | any migraine          | 74                | ----       | 1.852 (1.24-2.767)    | 0.0026         | 2.061 (1.147-3.703)   | 0.0156         | 2.40 (1.191-4.837)     | 0.0143         |
|                                     |                   | MA                    | 22                | ----       | 3.796 (1.881-7.659)   | 0.0002         | 4.195 (1.211-14.535)  | 0.0237         | 6.535 (2.541-16.808)   | <0.0001        |
|                                     |                   | MO                    | 52                | ----       | 1.376 (0.864-2.193)   | 0.1788         | 1.634 (0.854-3.127)   | 0.1382         | 1.231 (0.478-3.169)    | 0.6661         |
| Kara, 2003 <sup>2</sup>             | women+men         | controls              | 136               | 0.0019     | Referent              | ----           | Referent              | ----           | Referent               | ----           |
|                                     |                   | any migraine          | 93                | ----       | 1.797 (1.125-2.872)   | 0.0142         | 1.631 (0.954-2.786)   | 0.0737         | 6.306 (1.308-30.405)   | 0.0218         |
|                                     |                   | MA                    | 23                | ----       | 1.051 (0.462-2.390)   | 0.9053         | 0.944 (0.390-2.286)   | 0.8984         | 3.046 (0.265-35.027)   | 0.3715         |
|                                     |                   | MO                    | 70                | ----       | 2.161 (1.284-3.636)   | 0.0037         | 1.974 (1.086-3.586)   | 0.0257         | 7.442 (1.503-36.844)   | 0.0139         |
| Lea, 2004 <sup>3</sup>              | women+men         | controls              | 269               | 0.1626     | Referent              | ----           | Referent              | ----           | Referent               | ----           |
|                                     |                   | any migraine          | 268               | ----       | 1.277 (0.988-1.651)   | 0.0623         | 1.214 (0.860-1.712)   | 0.2703         | 1.821 (1.055-3.144)    | 0.0313         |
|                                     |                   | MA                    | 168               | ----       | 1.415 (1.063-1.884)   | 0.0173         | 1.251 (0.844-1.854)   | 0.2653         | 2.516 (1.416-4.473)    | 0.0017         |
|                                     |                   | MO                    | 100               | ----       | 1.051 (0.728-1.518)   | 0.79           | 1.155 (0.724-1.842)   | 0.5464         | 0.805 (0.334-1.939)    | 0.6288         |
| Oterino, 2005 <sup>4</sup>          | women+men         | controls              | 237               | 0.581      | Referent              | ----           | Referent              | ----           | Referent               | ----           |
|                                     |                   | any migraine          | 329               | ----       | 0.924 (0.721-1.184)   | 0.5324         | 0.866 (0.616-1.216)   | 0.405          | 0.993 (0.596-1.653)    | 0.9776         |
|                                     |                   | MA                    | 138               | ----       | 1.196 (0.883-1.620)   | 0.2464         | 1.087 (0.706-1.674)   | 0.7044         | 1.665 (0.935-2.965)    | 0.0833         |
|                                     |                   | MO                    | 191               | ----       | 0.743 (0.552-1.001)   | 0.051          | 0.738 (0.502-1.084)   | 0.1217         | 0.567 (0.291-1.107)    | 0.0966         |
| Scher, 2006 <sup>5</sup>            | women+men         | controls              | 1212              | 0.8373     | Referent              | ----           | Referent              | ----           | Referent               | ----           |
|                                     |                   | any migraine          | 413               | ----       | 1.105 (0.934-1.308)   | 0.2447         | 1.127 (0.90-1.411)    | 0.298          | 1.162 (0.810-1.667)    | 0.4143         |
|                                     |                   | MA                    | 187               | ----       | 1.364 (1.088-1.710)   | 0.0071         | 1.404 (1.024-1.925)   | 0.035          | 1.702 (1.097-2.640)    | 0.0177         |
|                                     |                   | MO                    | 226               | ----       | 0.916 (0.734-1.143)   | 0.437          | 0.944 (0.710-1.254)   | 0.6889         | 0.754 (0.444-1.281)    | 0.2965         |
| Todt, 2006 <sup>6</sup>             | women+men         | controls              | 625               | 0.2944     | Referent              | ----           | Referent              | ----           | Referent               | ----           |
|                                     |                   | MA                    | 656               | ----       | 0.882 (0.749-1.038)   | 0.131          | 0.796 (0.638-0.994)   | 0.0442         | 0.99 (0.705-1.391)     | 0.9548         |
| Kaunisto, 2006 <sup>7</sup>         | women+men         | controls              | 900               | 0.7093     | Referent              | ----           | Referent              | ----           | Referent               | ----           |
|                                     |                   | MA                    | 898               | ----       | 0.972 (0.833-1.135)   | 0.7219         | 0.999 (0.829-1.205)   | 0.9939         | 0.827 (0.551-1.242)    | 0.3599         |
| Bottini, 2006 <sup>8</sup>          | women+men         | controls              | 66                | 0.8002     | Referent              | ----           | Referent              | ----           | Referent               | ----           |

|                               |                   |                       |                   |            |                       |                |                       |                |                        |                |
|-------------------------------|-------------------|-----------------------|-------------------|------------|-----------------------|----------------|-----------------------|----------------|------------------------|----------------|
|                               |                   | any migraine          | 45                | ----       | 1.305 (0.77-2.212)    | 0.3225         | 1.036 (0.470-2.282)   | 0.9307         | 2.303 (0.878-6.043)    | 0.0901         |
|                               |                   | MA                    | 33                | ----       | 1.39 (0.771-2.506)    | 0.274          | 1.143 (0.474-2.757)   | 0.7663         | 2.375 (0.840-6.718)    | 0.103          |
|                               |                   | MO                    | 12                | ----       | 1.134 (0.469-2.742)   | 0.7802         | 0.80 (0.229-2.799)    | 0.7269         | 2.111 (0.479-9.309)    | 0.3236         |
| de Tommaso, 2007 <sup>9</sup> | women+men         | controls              | 97                | 1          | Referent              | ----           | Referent              | ----           | Referent               | ----           |
|                               |                   | any migraine          | 105               | ----       | 1.386 (0.942-2.039)   | 0.098          | 1.288 (0.719-2.306)   | 0.3951         | 2.052 (1.003-4.198)    | 0.049          |
| Pezzini, 2007 <sup>10</sup>   | women+men         | controls              | 105               | 0.8293     | Referent              | ----           | Referent              | ----           | Referent               | ----           |
|                               |                   | any migraine          | 206               | ----       | 1.225 (0.877-1.711)   | 0.2347         | 1.119 (0.690-1.816)   | 0.649          | 1.758 (0.896-3.448)    | 0.1009         |
|                               |                   | MA                    | 100               | ----       | 1.464 (0.995-2.152)   | 0.0529         | 1.301 (0.734-2.305)   | 0.3679         | 2.486 (1.195-5.173)    | 0.0148         |
|                               |                   | MO                    | 106               | ----       | 1.026 (0.689-1.529)   | 0.898          | 0.976 (0.562-1.696)   | 0.9319         | 1.166 (0.525-2.588)    | 0.7054         |
| Schürks, 2008 <sup>11</sup>   | women             | controls              | 20424             | 0.0626     | Referent              | ----           | Referent              | ----           | Referent               | ----           |
|                               |                   | any migraine          | 4577              | ----       | 0.969 (0.924-1.017)   | 0.206          | 0.987 (0.926-1.053)   | 0.7001         | 0.894 (0.805-0.993)    | 0.037          |
|                               |                   | MA                    | 1275              | ----       | 0.922 (0.846-1.005)   | 0.0636         | 0.944 (0.842-1.057)   | 0.316          | 0.792 (0.651-0.962)    | 0.0188         |
|                               |                   | MO                    | 1951              | ----       | 1.019 (0.951-1.092)   | 0.5956         | 1.045 (0.952-1.148)   | 0.3554         | 0.975 (0.841-1.131)    | 0.7422         |
| Ferro, 2008 <sup>12</sup>     | women+men         | controls              | 96                | 0.8319     | Referent              | ----           | Referent              | ----           | Referent               | ----           |
|                               |                   | any migraine          | 186               | ----       | 0.754 (0.516-1.10)    | 0.143          | 0.777 (0.468-1.291)   | 0.3299         | 0.551 (0.257-1.184)    | 0.1266         |
|                               |                   | MA                    | 78                | ----       | 0.634 (0.397-1.014)   | 0.0574         | 0.636 (0.346-1.168)   | 0.1446         | 0.401 (0.138-1.168)    | 0.0939         |
|                               |                   | MO                    | 108               | ----       | 0.855 (0.563-1.298)   | 0.4609         | 0.902 (0.511-1.591)   | 0.7211         | 0.664 (0.286-1.543)    | 0.3414         |
| Joshi, 2009 <sup>13</sup>     | women+men         | controls              | 150               | 1          | Referent              | ----           | Referent              | ----           | Referent               | ----           |
|                               |                   | any migraine          | 150               | ----       | 1.029 (0.643-1.648)   | 0.9045         | 1.137 (0.692-1.870)   | 0.6123         | ----                   | ----           |
|                               |                   | MA                    | 67                | ----       | 1.057 (0.589-1.898)   | 0.8518         | 1.174 (0.627-2.198)   | 0.6164         | ----                   | ----           |
|                               |                   | MO                    | 83                | ----       | 1.005 (0.579-1.745)   | 0.9855         | 1.108 (0.615-1.997)   | 0.7321         | ----                   | ----           |
|                               | women             | controls              | 100               | 0.7006     | Referent              | ----           | Referent              | ----           | Referent               | ----           |
|                               |                   | any migraine          | 100               | ----       | 1.128 (0.647-1.966)   | 0.6714         | 1.325 (0.726-2.417)   | 0.3595         | ----                   | ----           |
|                               | men               | controls              | 50                | 0.5639     | Referent              | ----           | Referent              | ----           | Referent               | ----           |
|                               |                   | any migraine          | 50                | ----       | 0.812 (0.332-1.989)   | 0.6492         | 0.812 (0.332-1.989)   | 0.6492         | ----                   | ----           |
| <b>ACE D/I polymorphism</b>   |                   |                       |                   |            |                       |                |                       |                |                        |                |
|                               |                   |                       |                   |            | <b>Additive model</b> |                | <b>Dominant model</b> |                | <b>Recessive model</b> |                |
| <b>Author</b>                 | <b>Population</b> | <b>Disease status</b> | <b>Study size</b> | <b>HWE</b> | <b>OR (95% CI)</b>    | <b>P value</b> | <b>OR (95% CI)</b>    | <b>P value</b> | <b>OR (95% CI)</b>     | <b>P value</b> |
| Paterna, 2000 <sup>14</sup>   | women+men         | controls              | 201               | 0.37       | Referent              | ----           | Referent              | ----           | Referent               | ----           |
|                               |                   | MO                    | 302               | ----       | 0.714 (0.543-0.938)   | 0.0154         | 0.636 (0.442-0.915)   | 0.0149         | 0.691 (0.389-1.230)    | 0.2088         |
| Cakmak, 2003 <sup>15</sup>    | women+men         | controls              | 231               | 0.1033     | Referent              | ----           | Referent              | ----           | Referent               | ----           |
|                               |                   | any migraine          | 200               | ----       | 1.01 (0.781-1.306)    | 0.9386         | 0.983 (0.666-1.451)   | 0.9313         | 1.063 (0.659-1.713)    | 0.8032         |
|                               | women             | controls              | 78                | 0.4752     | Referent              | ----           | Referent              | ----           | Referent               | ----           |
|                               |                   | any migraine          | 174               | ----       | 1.116 (0.773-1.611)   | 0.5585         | 1.106 (0.640-1.913)   | 0.7183         | 1.259 (0.624-2.539)    | 0.5199         |
|                               | men               | controls              | 153               | 0.1349     | Referent              | ----           | Referent              | ----           | Referent               | ----           |
|                               |                   | any migraine          | 26                | ----       | 0.833 (0.471-1.473)   | 0.5296         | 0.693 (0.300-1.601)   | 0.3903         | 0.937 (0.327-2.683)    | 0.9035         |
| Lin, 2005 <sup>16</sup>       | women+men         | controls              | 200               | 0.1764     | Referent              | ----           | Referent              | ----           | Referent               | ----           |

|                             |           |              |       |         |                     |        |                     |        |                     |        |
|-----------------------------|-----------|--------------|-------|---------|---------------------|--------|---------------------|--------|---------------------|--------|
|                             |           | any migraine | 240   | ----    | 1.07 (0.827-1.386)  | 0.6057 | 1.024 (0.620-1.691) | 0.9258 | 1.143 (0.781-1.672) | 0.4921 |
|                             | women     | controls     | 141   | 0.3741  | Referent            | ----   | Referent            | ----   | Referent            | ----   |
|                             |           | any migraine | 169   | ----    | 0.94 (0.694-1.272)  | 0.6871 | 0.746 (0.417-1.335) | 0.3238 | 1.042 (0.661-1.642) | 0.8593 |
|                             | men       | controls     | 59    | 0.2802  | Referent            | ----   | Referent            | ----   | Referent            | ----   |
|                             |           | any migraine | 71    | ----    | 1.547 (0.926-2.586) | 0.0959 | 3.024 (0.986-9.275) | 0.0529 | 1.418 (0.706-2.848) | 0.3265 |
| Kowa, 2005 <sup>17</sup>    | women+men | controls     | 248   | 1       | Referent            | ----   | Referent            | ----   | Referent            | ----   |
|                             |           | any migraine | 176   | ----    | 0.724 (0.546-0.959) | 0.0243 | 0.619 (0.363-1.056) | 0.0782 | 0.674 (0.450-1.010) | 0.0561 |
|                             |           | MA           | 54    | ----    | 0.551 (0.361-0.843) | 0.006  | 0.408 (0.200-0.835) | 0.0141 | 0.493 (0.255-0.952) | 0.0353 |
|                             |           | MO           | 122   | ----    | 0.818 (0.595-1.123) | 0.214  | 0.774 (0.418-1.436) | 0.417  | 0.766 (0.489-1.201) | 0.2453 |
| Lea, 2005 <sup>18</sup>     | women+men | controls     | 244   | 0.8953  | Referent            | ----   | Referent            | ----   | Referent            | ----   |
|                             |           | any migraine | 250   | ----    | 0.871 (0.668-1.136) | 0.3086 | 1.016 (0.694-1.488) | 0.9334 | 0.609 (0.372-0.999) | 0.0495 |
|                             |           | MA           | 151   | ----    | 0.845 (0.624-1.145) | 0.2777 | 0.971 (0.627-1.502) | 0.8938 | 0.583 (0.324-1.049) | 0.0716 |
|                             |           | MO           | 99    | ----    | 0.919 (0.651-1.298) | 0.6325 | 1.092 (0.655-1.820) | 0.7356 | 0.651 (0.334-1.266) | 0.2059 |
| Kara, 2007 <sup>19</sup>    | women+men | controls     | 210   | 0.1129  | Referent            | ----   | Referent            | ----   | Referent            | ----   |
|                             |           | any migraine | 180   | ----    | 0.755 (0.561-1.017) | 0.0641 | 0.942 (0.627-1.416) | 0.7732 | 0.341 (0.176-0.662) | 0.0015 |
|                             |           | MA           | 59    | ----    | 0.753 (0.495-1.146) | 0.1858 | 0.854 (0.475-1.535) | 0.5977 | 0.406 (0.152-1.082) | 0.0714 |
|                             |           | MO           | 109   | ----    | 0.773 (0.550-1.087) | 0.1389 | 0.964 (0.600-1.548) | 0.8786 | 0.347 (0.156-0.773) | 0.0095 |
| Tronvik, 2008 <sup>20</sup> | women+men | controls     | 403   | 0.8522  | Referent            | ----   | Referent            | ----   | Referent            | ----   |
|                             |           | any migraine | 347   | ----    | 0.954 (0.775-1.173) | 0.6528 | 1.020 (0.724-1.438) | 0.9091 | 0.870 (0.624-1.211) | 0.4089 |
|                             |           | MA           | 155   | ----    | 0.925 (0.708-1.209) | 0.5689 | 1.052 (0.674-1.644) | 0.8223 | 0.777 (0.501-1.207) | 0.2619 |
|                             |           | MO           | 187   | ----    | 0.979 (0.764-1.254) | 0.8656 | 0.991 (0.656-1.496) | 0.9644 | 0.955 (0.643-1.419) | 0.8214 |
| Schürks, 2009 <sup>21</sup> | women     | controls     | 20423 | <0.0001 | Referent            | ----   | Referent            | ----   | Referent            | ----   |
|                             |           | any migraine | 4577  | ----    | 0.993 (0.950-1.037) | 0.7444 | 1.014 (0.945-1.088) | 0.7084 | 0.965 (0.895-1.040) | 0.3447 |
|                             |           | MA           | 1275  | ----    | 0.982 (0.909-1.061) | 0.6517 | 1.017 (0.897-1.151) | 0.7968 | 0.932 (0.815-1.065) | 0.2979 |
|                             |           | MO           | 1951  | ----    | 0.959 (0.900-1.022) | 0.1943 | 0.973 (0.879-1.077) | 0.5931 | 0.912 (0.817-1.018) | 0.0995 |
| Joshi, 2009 <sup>13</sup>   | women+men | controls     | 150   | 0.0687  | Referent            | ----   | Referent            | ----   | Referent            | ----   |
|                             |           | any migraine | 150   | ----    | 0.819 (0.572-1.172) | 0.275  | 0.638 (0.296-1.375) | 0.2511 | 0.844 (0.529-1.346) | 0.4759 |
|                             |           | MA           | 67    | ----    | 0.633 (0.401-0.998) | 0.0492 | 0.443 (0.185-1.062) | 0.068  | 0.638 (0.344-1.183) | 0.1538 |
|                             |           | MO           | 83    | ----    | 1.014 (0.657-1.566) | 0.95   | 0.944 (0.357-2.498) | 0.9072 | 1.041 (0.603-1.797) | 0.8857 |
|                             | women     | controls     | 100   | 0.038   | Referent            | ----   | Referent            | ----   | Referent            | ----   |
|                             |           | any migraine | 100   | ----    | 0.678 (0.425-1.081) | 0.1026 | 0.474 (0.156-1.440) | 0.1877 | 0.683 (0.385-1.211) | 0.1917 |
|                             |           | MA           | 51    | ----    | 0.578 (0.329-1.013) | 0.0557 | 0.331 (0.099-1.101) | 0.0713 | 0.606 (0.297-1.235) | 0.1678 |
|                             |           | MO           | 49    | ----    | 0.803 (0.446-1.447) | 0.4659 | 0.807 (0.185-3.524) | 0.7756 | 0.770 (0.381-1.554) | 0.4655 |
|                             | men       | controls     | 50    | 0.7747  | Referent            | ----   | Referent            | ----   | Referent            | ----   |
|                             |           | any migraine | 50    | ----    | 1.182 (0.670-2.085) | 0.5642 | 1.000 (0.343-2.913) | 1      | 1.417 (0.624-3.218) | 0.4054 |
|                             |           | MA           | 16    | ----    | 0.712 (0.312-1.623) | 0.4188 | 0.571 (0.147-2.228) | 0.4203 | 0.708 (0.197-2.543) | 0.597  |
|                             |           | MO           | 34    | ----    | 1.526 (0.791-2.945) | 0.2074 | 1.429 (0.394-5.181) | 0.5874 | 1.889 (0.769-4.637) | 0.1652 |

HWE: Hardy-Weinberg Equilibrium p-value from exact test; MA: migraine with aura; MO: migraine without aura

1. Kowa H, Yasui K, Takeshima T, Urakami K, Sakai F, Nakashima K. The homozygous C677T mutation in the methylenetetrahydrofolate reductase gene is a genetic risk factor for migraine. *Am J Med Genet.* 2000;96:762-764.
2. Kara I, Sazci A, Ergul E, Kaya G, Kilic G. Association of the C677T and A1298C polymorphisms in the 5,10 methylenetetrahydrofolate reductase gene in patients with migraine risk. *Brain Res Mol Brain Res.* 2003;111:84-90.
3. Lea RA, Ovcarić M, Sundholm J, MacMillan J, Griffiths LR. The methylenetetrahydrofolate reductase gene variant C677T influences susceptibility to migraine with aura. *BMC Med.* 2004;2:3.
4. Oterino A, Valle N, Pascual J, *et al.* Thymidylate synthase promoter tandem repeat and MTHFD1 R653Q polymorphisms modulate the risk for migraine conferred by the MTHFR T677 allele. *Brain Res Mol Brain Res.* 2005;139:163-168.
5. Scher AI, Terwindt GM, Verschuren WM, *et al.* Migraine and MTHFR C677T genotype in a population-based sample. *Ann Neurol.* 2006;59:372-375.
6. Todt U, Freudenberg J, Goebel I, *et al.* MTHFR C677T polymorphism and migraine with aura. *Ann Neurol.* 2006;60:621-622; author reply 622-623.
7. Kaunisto MA, Kallela M, Hamalainen E, *et al.* Testing of variants of the MTHFR and ESR1 genes in 1798 Finnish individuals fails to confirm the association with migraine with aura. *Cephalalgia.* 2006;26:1462-1472.
8. Bottini F, Celle ME, Calevo MG, *et al.* Metabolic and genetic risk factors for migraine in children. *Cephalalgia.* 2006;26:731-737.
9. de Tommaso M, Difruscolo O, Sardaro M, *et al.* Influence of MTHFR genotype on contingent negative variation and MRI abnormalities in migraine. *Headache.* 2007;47:253-265.
10. Pezzini A, Grassi M, Del Zotto E, *et al.* Migraine mediates the influence of C677T MTHFR genotypes on ischemic stroke risk with a stroke-subtype effect. *Stroke.* 2007;38:3145-3151.
11. Schürks M, Zee RY, Buring JE, Kurth T. Interrelationships among the MTHFR 677C>T polymorphism, migraine, and cardiovascular disease. *Neurology.* 2008;71:505-513.
12. Ferro A, Castro MJ, Lemos C, *et al.* The C677T polymorphism in MTHFR is not associated with migraine in Portugal. *Dis Markers.* 2008;25:107-113.
13. Joshi G, Pradhan S, Mittal B. Role of the ACE ID and MTHFR C677T polymorphisms in genetic susceptibility of migraine in a north Indian population. *J Neurol Sci.* 2009;277:133-137.
14. Paterna S, Di Pasquale P, D'Angelo A, *et al.* Angiotensin-converting enzyme gene deletion polymorphism determines an increase in frequency of migraine attacks in patients suffering from migraine without aura. *Eur Neurol.* 2000;43:133-136.
15. Cakmak EA, Cataloluk O, Yoldas T, *et al.* Migraine and angiotensin-converting enzyme association in Turkish patients. *Pain Clinic.* 2003;15:473-477.
16. Lin JJ, Wang PJ, Chen CH, Yueh KC, Lin SZ, Harn HJ. Homozygous deletion genotype of angiotensin converting enzyme confers protection against migraine in man. *Acta Neurol Taiwan.* 2005;14:120-125.
17. Kowa H, Fusayasu E, Ijiri T, *et al.* Association of the insertion/deletion polymorphism of the angiotensin I-converting enzyme gene in patients of migraine with aura. *Neurosci Lett.* 2005;374:129-131.
18. Lea RA, Ovcarić M, Sundholm J, Solyom L, Macmillan J, Griffiths LR. Genetic variants of angiotensin converting enzyme and methylenetetrahydrofolate reductase may act in combination to increase migraine susceptibility. *Brain Res Mol Brain Res.* 2005;136:112-117.
19. Kara I, Ozkok E, Aydin M, *et al.* Combined effects of ACE and MMP-3 polymorphisms on migraine development. *Cephalalgia.* 2007;27:235-243.
20. Tronvik E, Stovner LJ, Bovim G, *et al.* Angiotensin-converting enzyme gene insertion/deletion polymorphism in migraine patients. *BMC Neurol.* 2008;8:4.
21. Schürks M, Zee RYL, Buring JE, Kurth T. ACE D/I Polymorphism, Migraine, and Cardiovascular Disease in Women. *Neurology.* 2009;72:650-656.
